# Supplementary material for: Commercial Vaccines Do Not Confer Protection against Two Genogroups of Piscirickettsia salmonis, LF-89 and EM-90, in Atlantic Salmon
Source: MDPI journal article supplement (doi:10.3390/biology11070993), 2022-06-30
Supplement: s1 [file s1]

## Supplementary Materials

### Commercial vaccines do not confer protection against two genetic strains of *Piscirickettsia salmonis*, LF-89-like and EM-90-like, in Atlantic salmon.

Carolina Figueroa, Débora Torrealba, Byron Morales-Lange, Luis Mercado, Brian Dixon, Pablo Conejeros, Gabriela Silva, Carlos Soto, José A. Gallardo\*

\* Correspondence: jose.gallardo@pucv.cl

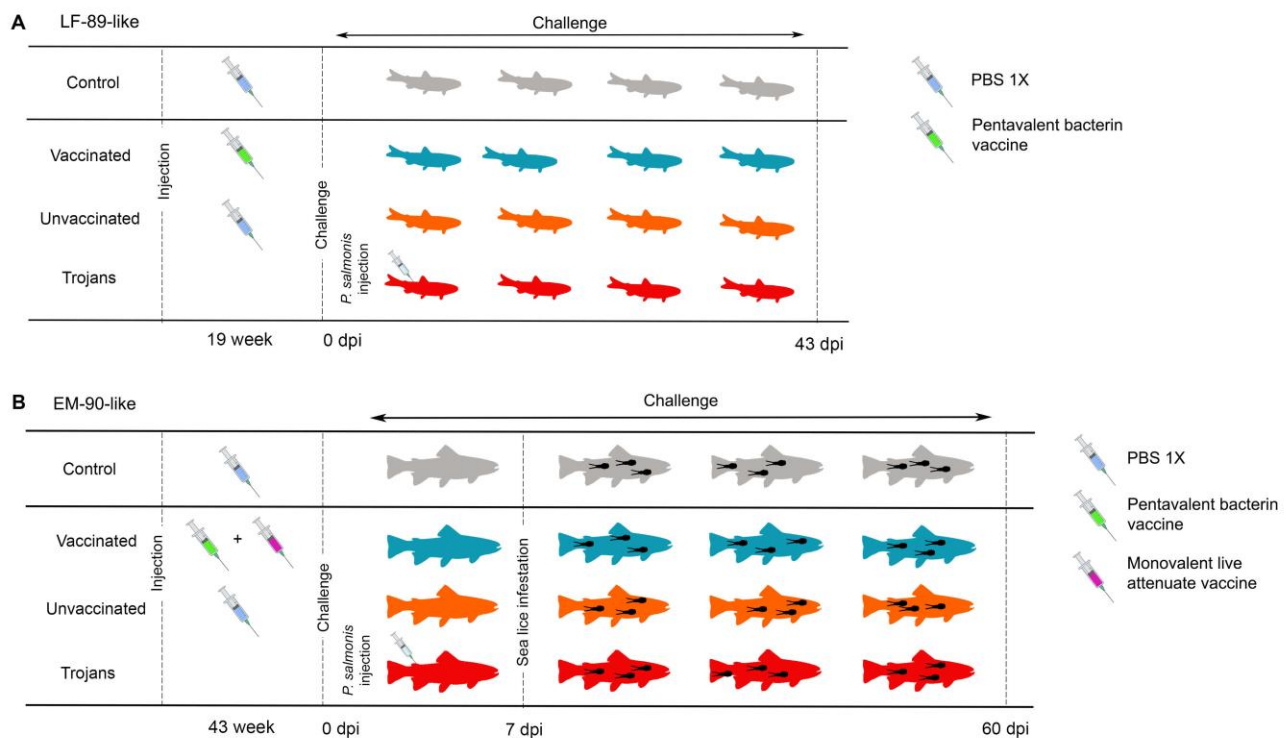

**Figure S1.** Experimental pipeline (A) Single infection of Atlantic salmon post-smolt with the *P. salmonis* LF-89-like genogroup. (B) Coinfection of Atlantic salmon adults with the *P. salmonis* EM-90-like genogroup and the sea louse *C. rogercresseyi*.

**Table S1.** Primary polyclonal antibodies used in ELISA analysis.

| Molecule          | Source | Dilution | Reference                |
|-------------------|--------|----------|--------------------------|
| anti-Igs          | Mouse  | 1:1,000  | Supplementary Figure S1  |
| anti-TNF $\alpha$ | Mouse  | 1:500    | Morales-Lange et al. [1] |
| anti-IFN $\gamma$ | Mouse  | 1:500    | Morales-Lange et al. [1] |

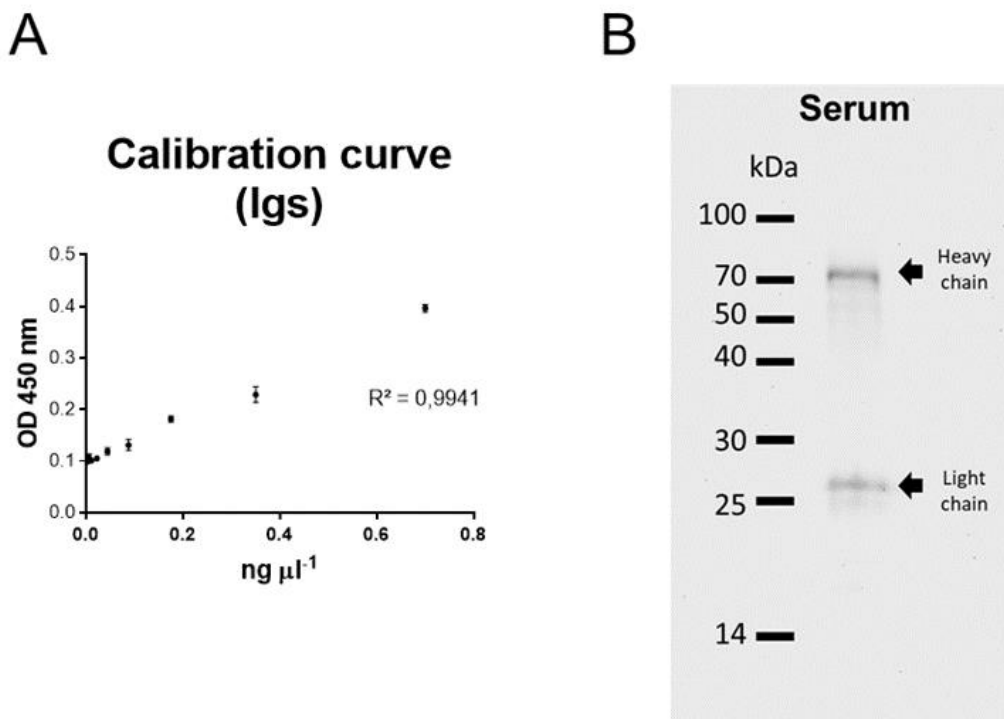

**Figure S2.** Validation of antibodies against total serum immunoglobulins (Igs) of *Salmo salar*: **(A)** Indirect ELISA calibration curve between total serum Igs concentration of *S. salar* (ng  $\mu\text{L}^{-1}$ ) and optical density at 450 nm; **(B)** Western blot. Antibodies were produced in mice using total serum Igs from Atlantic salmon as antigen. The antigen was obtained by the caprylic acid technique for immunoglobulin purification [23].

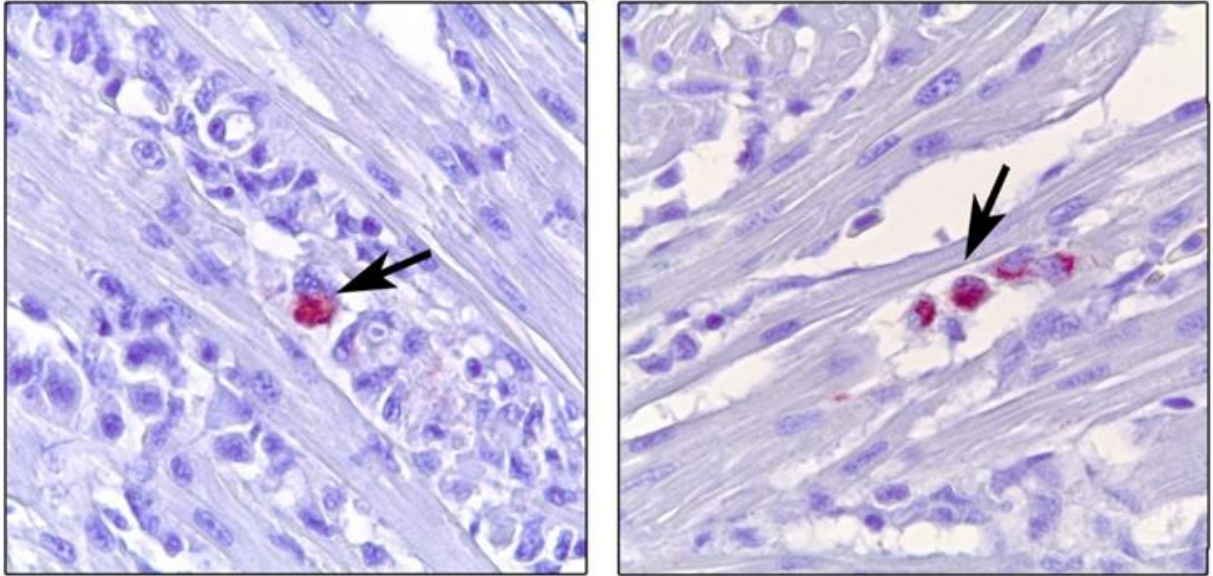

**Figure S3.** Presence of *Piscine orthoreovirus* (black arrows) in heart samples of Atlantic salmon from the first trial at day 41 post-infection with LF-89-like genogroup of *P. salmonis*. The virus was detected in 7 out of 17 fish analyzed by immunohistochemistry—magnification 63X.
